# Supplementary material for: Heterovalent Ga3+ doping in solution-processed Cu2ZnSn(S,Se)4 solar cells for better optoelectronic performance
Source: Royal Society of Chemistry journal article supplement (doi:10.1039/c9se00705a), 2019-12-09
Supplement: c9se00705a1.pdf [file c9se00705a1.pdf]

## Supporting Information

### Heterovalent Ga<sup>3+</sup> Doping in Solution-Processed Cu<sub>2</sub>ZnSn(S,Se)<sub>4</sub> Solar Cells for Better Optoelectronic Performance

Yachao Du,<sup>a</sup> Qingwen Tian,<sup>\*ab</sup> Jin Huang,<sup>b</sup> Yuechao Zhao,<sup>a</sup> Xiaohuan Chang,<sup>a</sup> Afei Zhang,<sup>a</sup> Sixin Wu<sup>\*a</sup>

<sup>a</sup> Key Lab for Special Functional Materials of Ministry of Education, National & Local Joint Engineering Research Center for High-efficiency Display and Lighting Technology, School of Materials Science and Engineering, and Collaborative Innovation Center of Nano Functional Materials and Applications, Henan University, Kaifeng, 475004, China

E-mail: tianqw@snnu.edu.cn, wusixin@henu.edu.cn

<sup>b</sup> Key Laboratory of Applied Surface and Colloid Chemistry, Ministry of Education, Shaanxi Key Laboratory for Advanced Energy Devices, Shaanxi Engineering Lab for Advanced Energy Technology, School of Materials Science and Engineering, Shaanxi Normal University, Xi'an 710119, China

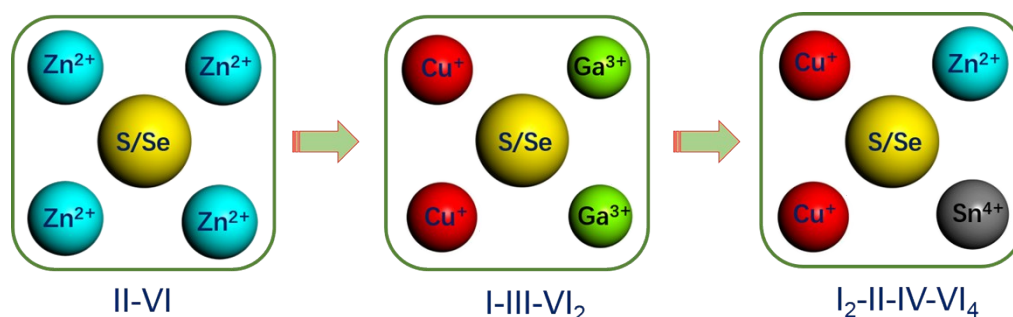

**Figure S1.** Schematic of the derivation of I<sub>2</sub>-II-IV-VI<sub>4</sub> semiconductors from binary II-VI and ternary I-III-VI<sub>2</sub> parent compounds.

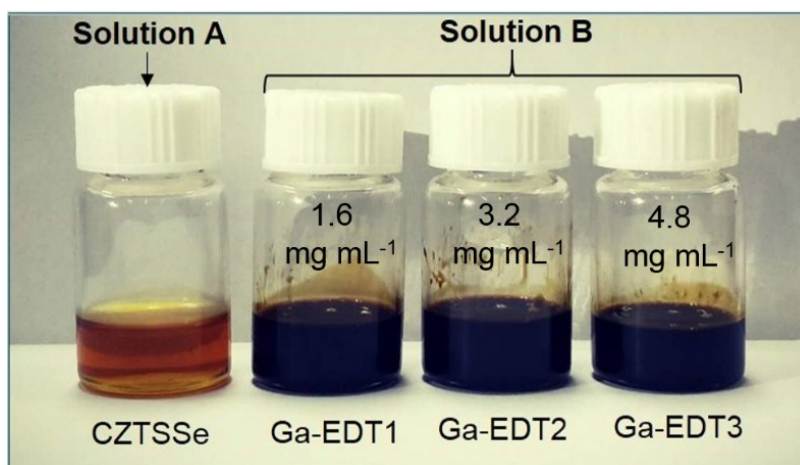

**Figure S2.** Digital photographs of the CZTSSe precursor solution and the three Ga-EDT precursor solutions with different Ga concentrations.

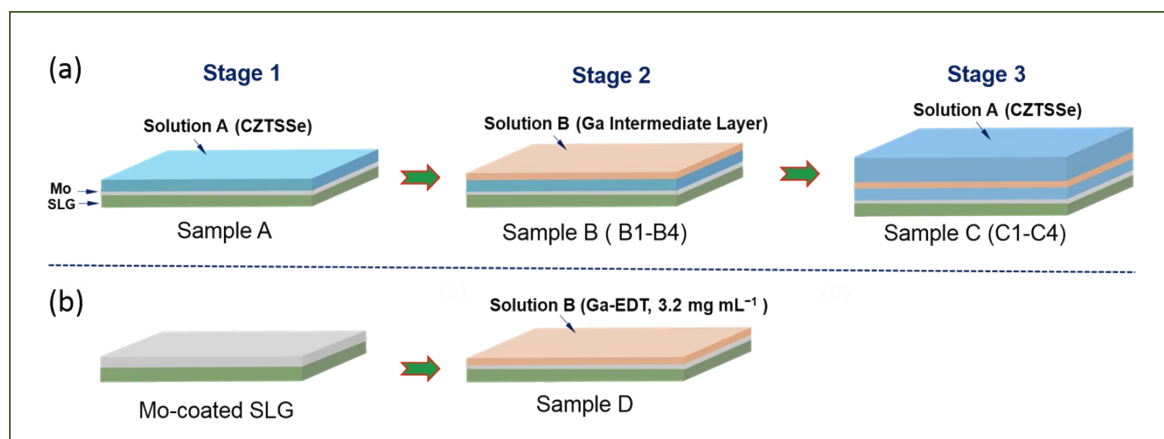

**Figure S3.** Schematic illustration of the fabrication procedures of Sample A-D.

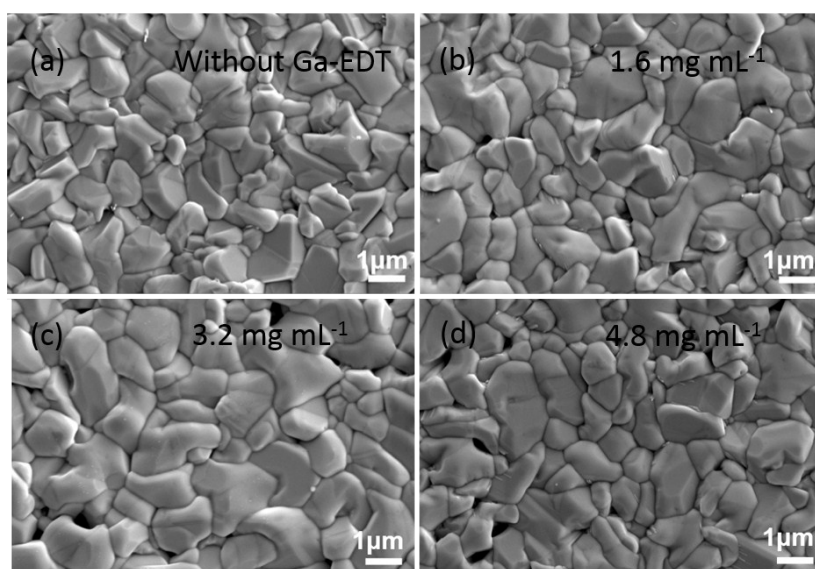

**Figure S4.** Top-view SEM images of the completed Ga doping  $\text{Cu}_2\text{ZnSn}(\text{S,Se})_4$  thin films with different doping level, (a)  $x = 0 \text{ mg mL}^{-1}$ , (b)  $x = 1.6 \text{ mg mL}^{-1}$ , (c)  $x = 3.2 \text{ mg mL}^{-1}$ , (d)  $x = 4.8 \text{ mg mL}^{-1}$ .

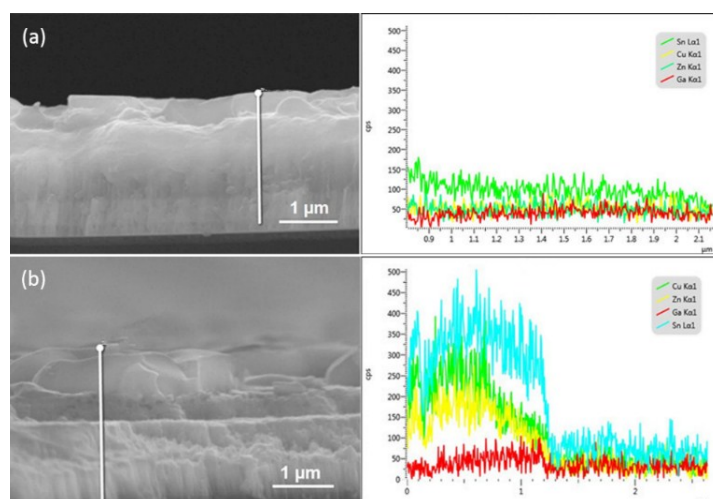

**Figure S5.** EDS line scan of the as-prepared film (a) and selenized film (b), [Sample B, Ga-EDT,  $x=3.2$  mg/mL].

**Table S1.** The ICP-OES measurements for the completed selenized  $\text{Cu}_2\text{ZnSn}(\text{S},\text{Se})_4$  thin films with different contents of Ga-EDT ( $x=0, 1.6, 3.2,$  and  $4.8$  mg  $\text{mL}^{-1}$ )

| ICP-OES               | Cu/(Zn+Sn+Ga) | Ga/(Zn+Sn)<br>[%] | [Cu]<br>[%] | [Zn]<br>[%] | [Sn]<br>[%] | [Ga]<br>[%] |
|-----------------------|---------------|-------------------|-------------|-------------|-------------|-------------|
| <b>Without Ga-EDT</b> | 0.700         | 0                 | 41.17       | 32.11       | 26.72       | 0           |
| <b>1.6 mg/mL</b>      | 0.689         | 2.65              | 40.78       | 31.78       | 25.91       | 1.53        |
| <b>3.2 mg/mL</b>      | 0.704         | 5.41              | 41.31       | 31.23       | 24.45       | 3.01        |
| <b>4.8 mg/mL</b>      | 0.698         | 7.80              | 41.09       | 30.67       | 23.98       | 4.26        |

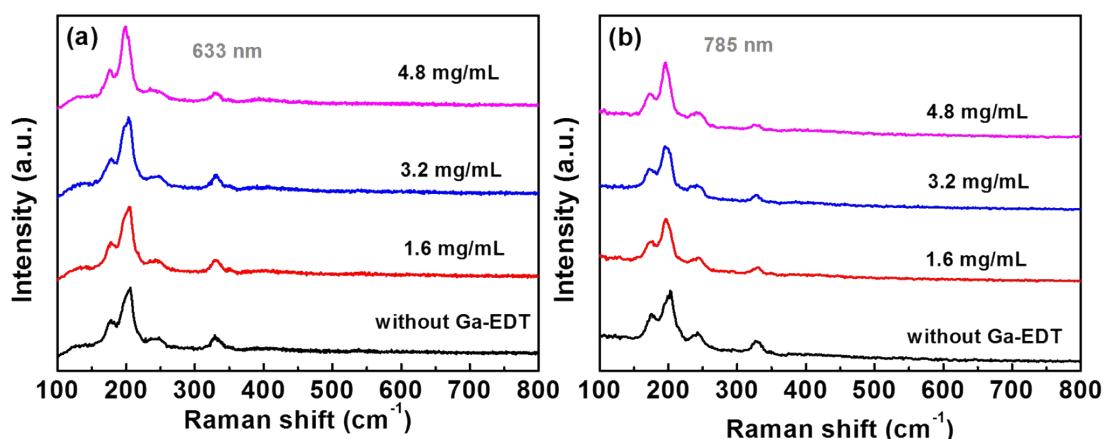

**Figure S6.** Raman spectra for the selenized CZTSSe thin films at different excitation wavelength: (a) 633 nm, (b) 785 nm.

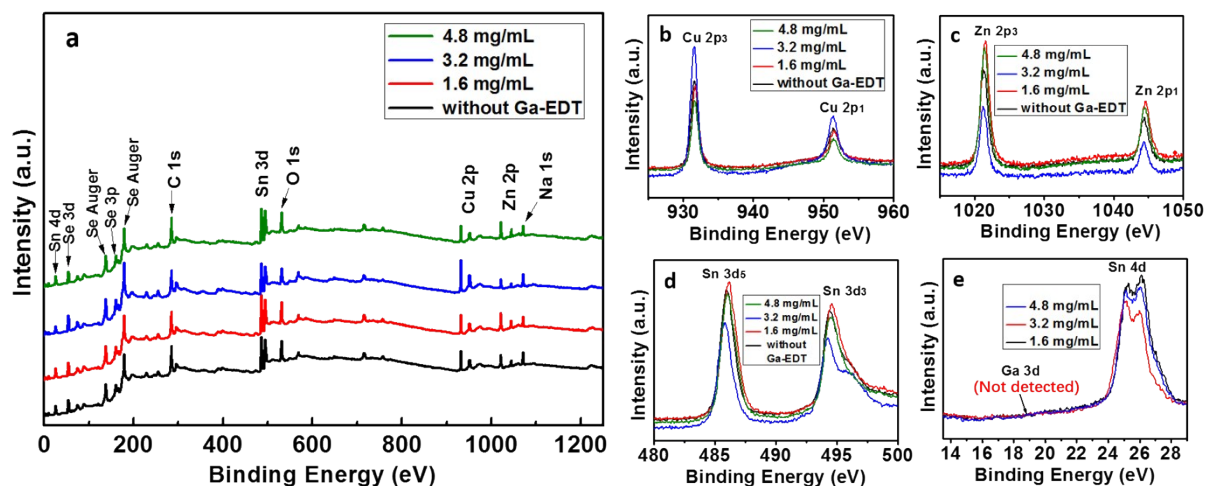

**Figure S7.** (a) Wide-scan X-ray photoelectron spectroscopy of the selenized  $\text{Cu}_2\text{ZnSn}(\text{S},\text{Se})_4$  films with different Ga doping level. High-resolution XPS data (b) Cu 2p region, (c) Zn 2p region, (d) Sn 3d region, and (e) Ga 3d region (not detected).

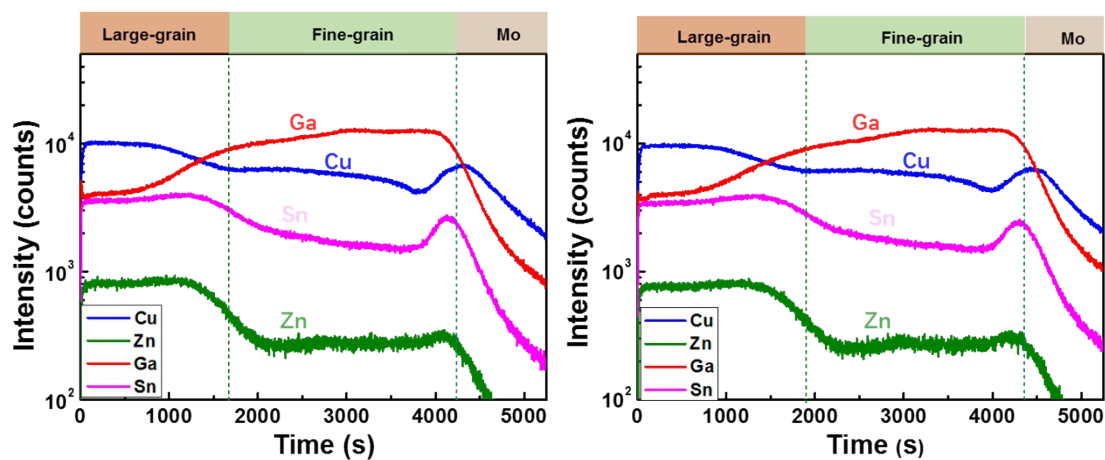

**Figure S8.** SIMS elemental depth profiles of the representative selenized  $\text{Cu}_2\text{ZnSn}(\text{S},\text{Se})_4$  films ( $x= 3.2 \text{ mg mL}^{-1}$ )

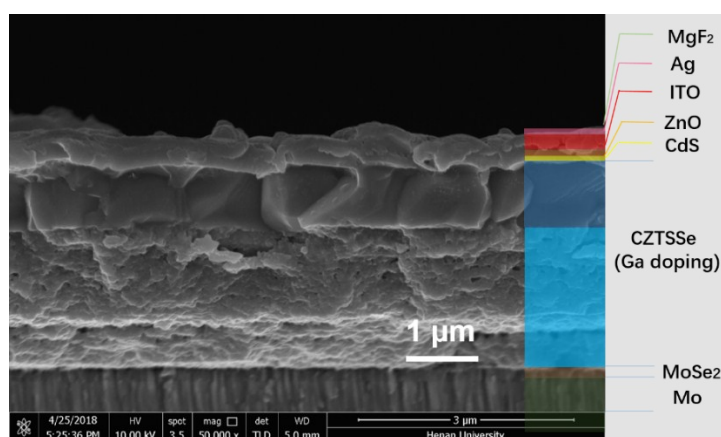

**Figure S9.** Cross-section SEM image of the Ga doped  $\text{Cu}_2\text{ZnSn}(\text{S},\text{Se})_4$  solar cells ( $x= 3.2 \text{ mg/mL}$ ).

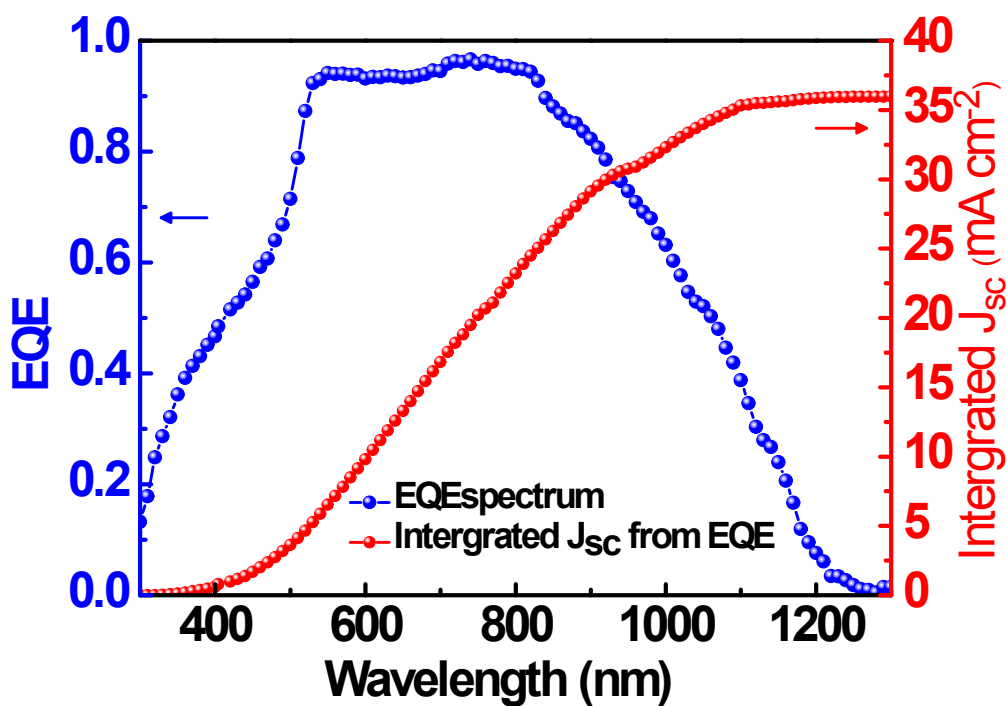

**Figure S10.** EQE spectrum and the intergrated  $J_{sc}$  of the champion Ga doped  $\text{Cu}_2\text{ZnSn}(\text{S,Se})_4$  ( $x = 3.2 \text{ mg mL}^{-1}$ ) solar cells.

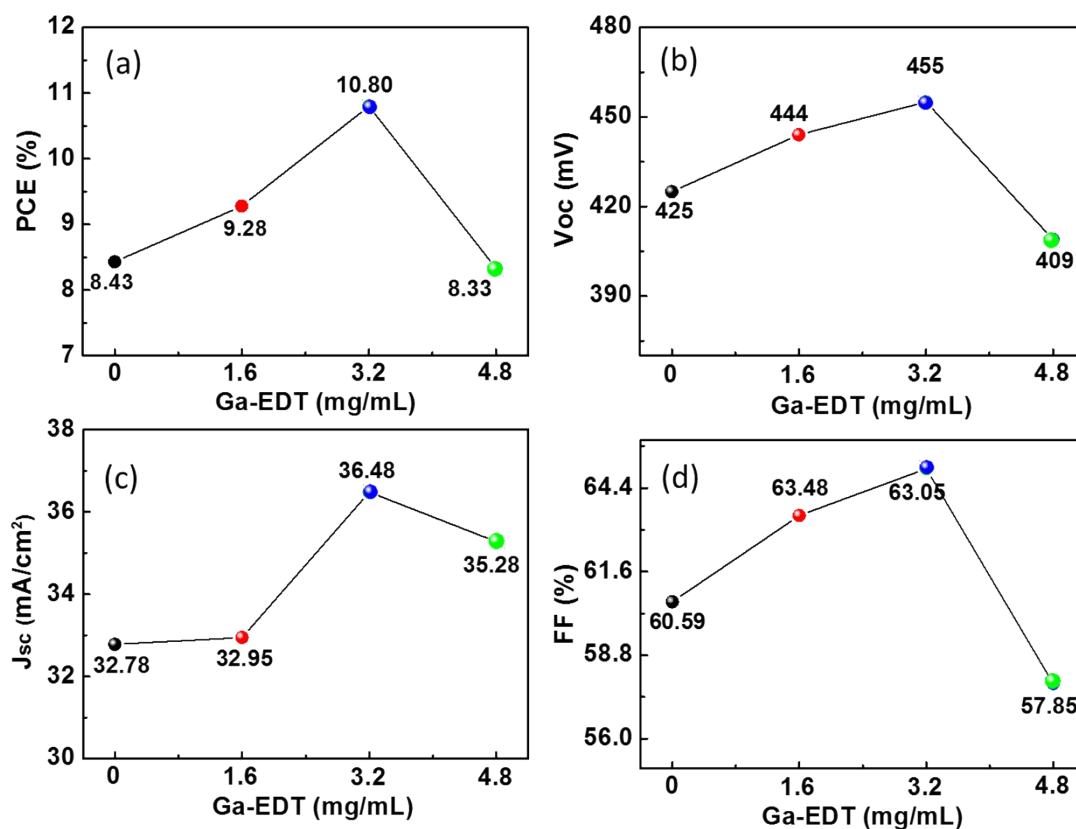

**Figure S11.** Variation of typical parameters of Ga doped  $\text{Cu}_2\text{ZnSn}(\text{S,Se})_4$  solar cells with different Ga doping level: (a) PCE, (b)  $V_{oc}$ , (c)  $J_{sc}$ , and (d) FF.

**Table S2.** The detailed photovoltaic parameters of Ga doped  $\text{Cu}_2\text{ZnSn}(\text{S},\text{Se})_4$  devices with different doping level, in which each sample contained 30 solar cells.

| <b>Ga-EDT</b><br><b>[without]</b> | <b>Efficiency</b><br><b>[%]</b> | <b>Voc</b><br><b>[mV]</b> | <b>Jsc</b><br><b>[mA/cm<sup>2</sup>]</b> | <b>FF</b><br><b>[%]</b> |
|-----------------------------------|---------------------------------|---------------------------|------------------------------------------|-------------------------|
| C1                                | 8.12                            | 420                       | 36.38                                    | 53.11                   |
| C2                                | 8.16                            | 387                       | 35.24                                    | 59.87                   |
| C3                                | 7.08                            | 391                       | 34.39                                    | 52.61                   |
| C4                                | 8.14                            | 390                       | 34.09                                    | 61.19                   |
| C5                                | 7.21                            | 376                       | 32.68                                    | 58.73                   |
| C6                                | 7.83                            | 370                       | 35.04                                    | 60.44                   |
| C7                                | 6.97                            | 371                       | 31.82                                    | 59.06                   |
| C8                                | 7.72                            | 365                       | 35.58                                    | 59.42                   |
| C9                                | 8.25                            | 402                       | 33.45                                    | 61.38                   |
| C10                               | 7.49                            | 393                       | 32.98                                    | 57.81                   |
| C11                               | 7.19                            | 389                       | 31.56                                    | 58.49                   |
| C12                               | 7.56                            | 406                       | 36.06                                    | 51.66                   |
| C13                               | 7.26                            | 403                       | 30.44                                    | 59.19                   |
| C14                               | 8.02                            | 418                       | 33.47                                    | 57.32                   |
| C15                               | 8.43                            | 425                       | 32.78                                    | 60.59                   |
| C16                               | 7.72                            | 406                       | 34.02                                    | 55.93                   |
| C17                               | 8.19                            | 413                       | 32.84                                    | 60.49                   |
| C18                               | 8.31                            | 415                       | 32.82                                    | 61.08                   |
| C19                               | 7.70                            | 388                       | 31.80                                    | 62.46                   |
| C20                               | 7.17                            | 383                       | 30.67                                    | 61.08                   |
| C21                               | 6.95                            | 377                       | 30.47                                    | 60.40                   |
| C22                               | 7.38                            | 398                       | 33.20                                    | 55.83                   |
| C23                               | 6.80                            | 373                       | 30.29                                    | 60.11                   |
| C24                               | 7.99                            | 382                       | 36.78                                    | 56.86                   |
| C25                               | 7.59                            | 394                       | 35.37                                    | 54.41                   |
| C26                               | 6.72                            | 391                       | 30.26                                    | 56.73                   |
| C27                               | 8.18                            | 383                       | 36.44                                    | 58.58                   |
| C28                               | 7.56                            | 378                       | 35.57                                    | 56.19                   |
| C29                               | 7.68                            | 374                       | 37.15                                    | 55.32                   |
| C30                               | 7.00                            | 372                       | 33.06                                    | 56.92                   |
| <b>Average</b>                    | <b>7.61</b>                     | <b>391</b>                | <b>33.56</b>                             | <b>58.11</b>            |

---

| <b>Ga-EDT</b><br><b>[1.6 mg/mL]</b> | <b>Efficiency</b><br><b>[%]</b> | <b>Voc</b><br><b>[mV]</b> | <b>Jsc</b><br><b>[mA/cm<sup>2</sup>]</b> | <b>FF</b><br><b>[%]</b> |
|-------------------------------------|---------------------------------|---------------------------|------------------------------------------|-------------------------|
| C1                                  | 7.20                            | 418                       | 29.81                                    | 57.79                   |
| C2                                  | 7.93                            | 405                       | 33.93                                    | 57.66                   |
| C3                                  | 7.14                            | 409                       | 29.96                                    | 58.30                   |
| C4                                  | 6.93                            | 421                       | 28.44                                    | 57.85                   |
| C5                                  | 7.07                            | 394                       | 30.63                                    | 58.55                   |
| C6                                  | 8.38                            | 424                       | 31.55                                    | 62.68                   |
| C7                                  | 7.87                            | 425                       | 29.55                                    | 62.72                   |
| C8                                  | 8.15                            | 411                       | 31.96                                    | 62.10                   |
| C9                                  | 7.77                            | 418                       | 30.57                                    | 60.83                   |
| C10                                 | 7.09                            | 421                       | 27.19                                    | 61.93                   |
| C11                                 | 7.07                            | 403                       | 28.08                                    | 62.43                   |
| C12                                 | 8.66                            | 429                       | 32.82                                    | 61.56                   |
| C13                                 | 7.34                            | 391                       | 32.49                                    | 57.85                   |
| C14                                 | 8.36                            | 415                       | 32.23                                    | 62.41                   |
| C15                                 | 8.97                            | 425                       | 33.33                                    | 63.35                   |
| C16                                 | 6.89                            | 384                       | 30.95                                    | 57.99                   |
| C17                                 | 7.91                            | 420                       | 30.88                                    | 61.06                   |
| C18                                 | 9.28                            | 444                       | 32.95                                    | 63.48                   |
| C19                                 | 9.29                            | 443                       | 32.81                                    | 63.89                   |
| C20                                 | 9.09                            | 439                       | 32.49                                    | 63.71                   |
| C21                                 | 8.12                            | 435                       | 31.81                                    | 58.72                   |
| C22                                 | 9.03                            | 442                       | 31.92                                    | 63.99                   |
| C23                                 | 7.49                            | 401                       | 31.70                                    | 58.92                   |
| C24                                 | 7.84                            | 435                       | 30.40                                    | 59.23                   |
| C25                                 | 8.52                            | 418                       | 34.10                                    | 59.7                    |
| C26                                 | 8.15                            | 430                       | 32.45                                    | 58.45                   |
| C27                                 | 8.32                            | 423                       | 32.37                                    | 60.86                   |
| C28                                 | 7.22                            | 422                       | 28.75                                    | 59.49                   |
| C29                                 | 8.04                            | 401                       | 32.30                                    | 62.04                   |
| C30                                 | 7.77                            | 410                       | 33.02                                    | 57.36                   |
| <b>Average</b>                      | <b>7.96</b>                     | <b>419</b>                | <b>31.38</b>                             | <b>60.56</b>            |

---

---

| <b>Ga-EDT</b><br><b>[3.2 mg/mL]</b> | <b>Efficiency</b><br><b>[%]</b> | <b>Voc</b><br><b>[mV]</b> | <b>Jsc</b><br><b>[mA/cm<sup>2</sup>]</b> | <b>FF</b><br><b>[%]</b> |
|-------------------------------------|---------------------------------|---------------------------|------------------------------------------|-------------------------|
| C1                                  | 9.25                            | 411                       | 35.20                                    | 63.93                   |
| C2                                  | 9.13                            | 420                       | 34.77                                    | 62.49                   |
| C3                                  | 9.80                            | 436                       | 34.96                                    | 64.36                   |
| C4                                  | 9.05                            | 420                       | 34.44                                    | 62.59                   |
| C5                                  | 8.92                            | 431                       | 34.21                                    | 60.56                   |
| C6                                  | 9.21                            | 401                       | 36.07                                    | 63.68                   |
| C7                                  | 8.79                            | 412                       | 34.32                                    | 62.08                   |
| C8                                  | 9.00                            | 430                       | 35.41                                    | 59.18                   |
| C9                                  | 9.01                            | 420                       | 35.42                                    | 60.54                   |
| C10                                 | 8.64                            | 415                       | 34.42                                    | 60.49                   |
| C11                                 | 9.04                            | 425                       | 34.39                                    | 61.78                   |
| C12                                 | 8.69                            | 423                       | 33.28                                    | 61.74                   |
| C13                                 | 9.21                            | 433                       | 34.67                                    | 61.35                   |
| C14                                 | 8.92                            | 403                       | 37.25                                    | 59.45                   |
| C15                                 | 8.97                            | 437                       | 33.11                                    | 61.95                   |
| C16                                 | 9.60                            | 453                       | 35.06                                    | 60.49                   |
| C17                                 | 9.60                            | 450                       | 35.62                                    | 59.88                   |
| C18                                 | 8.96                            | 436                       | 34.06                                    | 60.27                   |
| C19                                 | 9.05                            | 419                       | 36.56                                    | 59.15                   |
| C20                                 | 9.55                            | 415                       | 36.94                                    | 62.20                   |
| C21                                 | 9.15                            | 420                       | 34.19                                    | 63.67                   |
| C22                                 | 8.92                            | 421                       | 35.13                                    | 60.40                   |
| C23                                 | 10.80                           | 455                       | 36.48                                    | 65.05                   |
| C24                                 | 9.91                            | 436                       | 37.05                                    | 61.31                   |
| C25                                 | 10.02                           | 437                       | 37.10                                    | 61.73                   |
| C26                                 | 10.03                           | 439                       | 37.41                                    | 61.13                   |
| C27                                 | 10.04                           | 445                       | 36.85                                    | 61.24                   |
| C28                                 | 9.82                            | 441                       | 36.88                                    | 60.35                   |
| C29                                 | 9.15                            | 443                       | 34.19                                    | 60.41                   |
| C30                                 | 9.11                            | 448                       | 34.00                                    | 59.82                   |
| <b>Average</b>                      | <b>9.31</b>                     | <b>429</b>                | <b>35.36</b>                             | <b>61.37</b>            |

---



---

| <b>Ga-EDT</b><br><b>[4.8 mg/mL]</b> | <b>Efficiency</b><br><b>[%]</b> | <b>Voc</b><br><b>[mV]</b> | <b>Jsc</b><br><b>[mA/cm<sup>2</sup>]</b> | <b>FF</b><br><b>[%]</b> |
|-------------------------------------|---------------------------------|---------------------------|------------------------------------------|-------------------------|
| C1                                  | 7.71                            | 382                       | 34.84                                    | 57.99                   |
| C2                                  | 7.07                            | 409                       | 29.40                                    | 58.72                   |
| C3                                  | 6.88                            | 397                       | 31.87                                    | 54.44                   |
| C4                                  | 6.40                            | 404                       | 28.62                                    | 55.32                   |
| C5                                  | 7.13                            | 400                       | 32.11                                    | 55.57                   |
| C6                                  | 7.56                            | 412                       | 30.63                                    | 59.94                   |
| C7                                  | 8.28                            | 423                       | 32.62                                    | 60.04                   |
| C8                                  | 8.30                            | 425                       | 32.68                                    | 59.70                   |
| C9                                  | 8.01                            | 411                       | 33.27                                    | 58.61                   |
| C10                                 | 7.61                            | 415                       | 29.88                                    | 61.33                   |
| C11                                 | 7.06                            | 386                       | 32.64                                    | 56.07                   |
| C12                                 | 6.74                            | 408                       | 29.24                                    | 56.59                   |
| C13                                 | 6.68                            | 399                       | 29.23                                    | 57.26                   |
| C14                                 | 6.81                            | 398                       | 31.42                                    | 54.55                   |
| C15                                 | 6.89                            | 406                       | 29.97                                    | 56.70                   |
| C16                                 | 6.44                            | 394                       | 30.46                                    | 53.65                   |
| C17                                 | 6.97                            | 423                       | 26.97                                    | 61.03                   |
| C18                                 | 7.46                            | 411                       | 29.97                                    | 60.62                   |
| C19                                 | 7.55                            | 427                       | 31.31                                    | 56.51                   |
| C20                                 | 8.34                            | 429                       | 32.93                                    | 59.02                   |
| C21                                 | 7.13                            | 385                       | 35.59                                    | 52.00                   |
| C22                                 | 8.34                            | 409                       | 35.28                                    | 57.85                   |
| C23                                 | 6.48                            | 415                       | 28.07                                    | 55.70                   |
| C24                                 | 7.37                            | 418                       | 30.47                                    | 57.87                   |
| C25                                 | 7.70                            | 402                       | 33.75                                    | 56.77                   |
| C26                                 | 6.70                            | 391                       | 31.78                                    | 53.92                   |
| C27                                 | 7.00                            | 403                       | 30.08                                    | 57.70                   |
| C28                                 | 6.58                            | 413                       | 26.12                                    | 61.07                   |
| C29                                 | 7.02                            | 405                       | 29.60                                    | 58.57                   |
| C30                                 | 7.08                            | 404                       | 30.27                                    | 57.88                   |
| <b>Average</b>                      | <b>7.24</b>                     | <b>407</b>                | <b>31.04</b>                             | <b>57.43</b>            |

---
